# Supplementary material for: A Homozygous CNP Missense Mutation in Weimaraners With an Adult-Onset Neurodegenerative Disease, Myelin Abnormalities and Accumulation of Lipofuscin-Like Inclusions
Source: Preprints.org preprint supplement (doi:10.20944/preprints202401.1986.v1), 2024-01-30
Supplement: Supplementary file 2 [file supplementary]

**Supplementary File S1 \_: SRA BioSample IDs for the 4,062 sample cohort, sorted in ascen**

**BioSample ID**

SAMN24256744

SAMN03580379

SAMN03580380

SAMN03580381

SAMN04196845

SAMN03323670

SAMN04196846

SAMN03323672

SAMN04196847

SAMN04196848

SAMN03580382

SAMN03145702

SAMN03145703

SAMN03580383

SAMN03580384

SAMN03580385

SAMN03580386

SAMN03580387

SAMN03580388

SAMN03580389

SAMN03580390

SAMN03580391

SAMN03580392

SAMN03580393

SAMN10940760

SAMN10940761

SAMN10940762

SAMN03580394

SAMN03580395

SAMN03580396

SAMN03580397

SAMN03580398

SAMN03580399

SAMN03323668

SAMN03580400

SAMN03580401

SAMN03580402

SAMN03580403

SAMN03580404

SAMN03580405

SAMN03580406

SAMN03580407  
SAMN03580408  
SAMN03145704  
SAMN10940763  
SAMN10940764  
SAMN03580409  
SAMN10940765  
SAMN03580410  
SAMN03580411  
SAMN03580412  
SAMN03075611  
SAMN03580413  
SAMN03323676  
SAMN04196849  
SAMN04196850  
SAMN03323671  
SAMN04196851  
SAMN04196852  
SAMN03323673  
SAMN04196853  
SAMN03323674  
SAMN04196854  
SAMN04196855  
SAMN04196856  
SAMN04196857  
SAMN04196858  
SAMN04196859  
SAMN04196860  
SAMN03323675  
SAMN04196861  
SAMN04196862  
SAMN03323669  
SAMN03323677  
SAMN04196863  
SAMN04196864  
SAMN04196865  
SAMN06159667  
SAMN06159668  
SAMN06159669  
SAMN06159670  
SAMN06159671  
SAMN06159672  
SAMN06159673  
SAMN05770194

SAMN06159674  
SAMN06159675  
SAMN06159676  
SAMN06159677  
SAMN06159678  
SAMN06159679  
SAMN06159680  
SAMN06159681  
SAMN06159682  
SAMN06159683  
SAMN06159684  
SAMN06159685  
SAMN06159686  
SAMN06159687  
SAMN06159688  
SAMN06159689  
SAMN10940769  
SAMN10940770  
SAMN10940771  
SAMN10940772  
SAMN10940773  
SAMN10940774  
SAMN10940775  
SAMN10940776  
SAMN10940777  
SAMN10940778  
SAMN10940779  
SAMN10940780  
SAMN10940781  
SAMN10940782  
SAMN10940783  
SAMN10940784  
SAMN10940785  
SAMN10940786  
SAMN10940787  
SAMN10940788  
SAMN10940789  
SAMN10940790  
SAMN10940791  
SAMN10940792  
SAMN10940793  
SAMN10940794  
SAMN10940795  
SAMN10940796

SAMN10940797  
SAMN10940798  
SAMN10940799  
SAMN10940800  
SAMN10940801  
SAMN10940802  
SAMN10940803  
SAMN10940804  
SAMN10940805  
SAMN10940806  
SAMN10940807  
SAMN10940808  
SAMN10940809  
SAMN10940810  
SAMN10940811  
SAMN10940812  
SAMN10940813  
SAMN10940814  
SAMN10940815  
SAMN10940816  
SAMN10940817  
SAMN10940818  
SAMN10940819  
SAMN10940820  
SAMN10940821  
SAMN10940822  
SAMN10940823  
SAMN10940824  
SAMN10940825  
SAMN10940826  
SAMN10940827  
SAMN12700520  
SAMN12700521  
SAMN12700522  
SAMN12700523  
SAMN12700524  
SAMN12700525  
SAMN12700526  
SAMN12700527  
SAMN12700528  
SAMN12700529  
SAMN12700530  
SAMN12700531  
SAMN12700532

SAMN12700533  
SAMN12700534  
SAMN12700535  
SAMN12700536  
SAMN12700537  
SAMN12700538  
SAMN12700539  
SAMN12700540  
SAMN12700541  
SAMN12700542  
SAMN12700543  
SAMN12700544  
SAMN12700545  
SAMN12700546  
SAMN12700547  
SAMN12700548  
SAMN12700549  
SAMN12700550  
SAMN12700551  
SAMN12700552  
SAMN12700553  
SAMN12700554  
SAMN12700555  
SAMN13655888  
SAMN13655889  
SAMN13655890  
SAMN13655891  
SAMN13655892  
SAMN13655893  
SAMN13655894  
SAMN13655895  
SAMN13655896  
SAMN13655897  
SAMN13655898  
SAMN13655899  
SAMN13655900  
SAMN13655901  
SAMN13655902  
SAMN13655903  
SAMN13655904  
SAMN13655905  
SAMN13655906  
SAMN13655907  
SAMN13655908

SAMN13655909  
SAMN13655910  
SAMN13655911  
SAMN13655912  
SAMN13655913  
SAMN13655914  
SAMN13655915  
SAMN13655916  
SAMN13655917  
SAMN13655918  
SAMN13655919  
SAMN13655920  
SAMN13655921  
SAMN13655922  
SAMN13655923  
SAMN24256719  
SAMN24256720  
SAMN24256721  
SAMN24256722  
SAMN24256723  
SAMN24256724  
SAMN24256725  
SAMN24256726  
SAMN24256727  
SAMN24256728  
SAMN24256729  
SAMN24256730  
SAMN24256731  
SAMN24256732  
SAMN24256733  
SAMN24256734  
SAMN24256735  
SAMN24256736  
SAMN24256737  
SAMN24256738  
SAMN24256739  
SAMN24256740  
SAMN24256741  
SAMN24256742  
SAMN24256743  
SAMN24256745  
SAMD00009664  
SAMEA103135918  
SAMEA103935360

SAMEA103949042  
SAMEA104016307  
SAMEA104032048  
SAMEA104091550  
SAMEA104091551  
SAMEA104091552  
SAMEA104091553  
SAMEA104091554  
SAMEA104091555  
SAMEA104091556  
SAMEA104091557  
SAMEA104091558  
SAMEA104091559  
SAMEA104091560  
SAMEA104091561  
SAMEA104091562  
SAMEA104091563  
SAMEA104091564  
SAMEA104091565  
SAMEA104091566  
SAMEA104091567  
SAMEA104091568  
SAMEA104091569  
SAMEA104091570  
SAMEA104091571  
SAMEA104091572  
SAMEA104091573  
SAMEA104105252  
SAMEA104125075  
SAMEA104125112  
SAMEA104125113  
SAMEA104125115  
SAMEA104125116  
SAMEA104125117  
SAMEA104125118  
SAMEA104125119  
SAMEA104125120  
SAMEA104125121  
SAMEA104140396  
SAMEA104140397  
SAMEA104140398  
SAMEA104190273  
SAMEA104211056  
SAMEA104211057

SAMEA104211058  
SAMEA104345830  
SAMEA104379879  
SAMEA104379880  
SAMEA104379881  
SAMEA104379882  
SAMEA104379883  
SAMEA104379884  
SAMEA104379885  
SAMEA104388841  
SAMEA104388842  
SAMEA104388843  
SAMEA104388844  
SAMEA104388845  
SAMEA104388846  
SAMEA104388847  
SAMEA104388848  
SAMEA104388849  
SAMEA104388850  
SAMEA104388851  
SAMEA104389201  
SAMEA104389202  
SAMEA104389203  
SAMEA104389204  
SAMEA104389205  
SAMEA104389206  
SAMEA104389207  
SAMEA104389208  
SAMEA104389209  
SAMEA104389210  
SAMEA104389211  
SAMEA104389212  
SAMEA104389213  
SAMEA104389237  
SAMEA104389238  
SAMEA104389239  
SAMEA104389240  
SAMEA104389241  
SAMEA104389242  
SAMEA104389243  
SAMEA104427625  
SAMEA104500411  
SAMEA104500412  
SAMEA104500413



SAMEA104656180  
SAMEA104656181  
SAMEA104656182  
SAMEA104656183  
SAMEA104658568  
SAMEA104658569  
SAMEA104658570  
SAMEA1066474  
SAMEA1066475  
SAMEA1066476  
SAMEA1521940  
SAMEA1521941  
SAMEA1561463  
SAMEA1681455  
SAMEA1681463  
SAMEA1681464  
SAMEA1681469  
SAMEA1681472  
SAMEA2177732  
SAMEA2358413  
SAMEA2358414  
SAMEA2358415  
SAMEA2358416  
SAMEA2376414  
SAMEA2417015  
SAMEA2417016  
SAMEA2446055  
SAMEA2446720  
SAMEA3121328  
SAMEA3121337  
SAMEA3121338  
SAMEA3164479  
SAMEA3402917  
SAMEA3449656  
SAMEA3449657  
SAMEA3539249  
SAMEA3723573  
SAMEA3724570  
SAMEA3724571  
SAMEA3905753  
SAMEA3906811  
SAMEA3906812  
SAMEA3906815  
SAMEA3906823

SAMEA3906850  
SAMEA3906876  
SAMEA3906879  
SAMEA3906880  
SAMEA3906883  
SAMEA3906885  
SAMEA3906887  
SAMEA3906889  
SAMEA3906893  
SAMEA3906895  
SAMEA3906897  
SAMEA3906903  
SAMEA3906904  
SAMEA3906905  
SAMEA3906906  
SAMEA3906909  
SAMEA3906910  
SAMEA3906911  
SAMEA3906912  
SAMEA3906913  
SAMEA3906916  
SAMEA3906918  
SAMEA3906919  
SAMEA3906921  
SAMEA3906923  
SAMEA3906926  
SAMEA3906927  
SAMEA3906931  
SAMEA3906933  
SAMEA3906946  
SAMEA3906956  
SAMEA3906959  
SAMEA3906961  
SAMEA3906965  
SAMEA3906973  
SAMEA3906979  
SAMEA3906982  
SAMEA3906986  
SAMEA3906989  
SAMEA3906992  
SAMEA3906993  
SAMEA3906994  
SAMEA3907000  
SAMEA3907006

SAMEA3907009  
SAMEA3907010  
SAMEA3907011  
SAMEA3907012  
SAMEA3907014  
SAMEA3907016  
SAMEA3907017  
SAMEA3907018  
SAMEA3907019  
SAMEA3907020  
SAMEA3907022  
SAMEA3907028  
SAMEA3907030  
SAMEA3907032  
SAMEA3907035  
SAMEA3907038  
SAMEA3907040  
SAMEA3907043  
SAMEA3907044  
SAMEA3907045  
SAMEA3907046  
SAMEA3907048  
SAMEA3907052  
SAMEA3907058  
SAMEA3907061  
SAMEA3907064  
SAMEA3907067  
SAMEA3907069  
SAMEA3907071  
SAMEA3907073  
SAMEA3907076  
SAMEA3907083  
SAMEA3907180  
SAMEA3907184  
SAMEA3907186  
SAMEA3907187  
SAMEA3907188  
SAMEA3907189  
SAMEA3907190  
SAMEA3907191  
SAMEA3907192  
SAMEA3907193  
SAMEA3907198  
SAMEA3907199

SAMEA3907203  
SAMEA3907205  
SAMEA3907207  
SAMEA3907208  
SAMEA3907212  
SAMEA3907215  
SAMEA3907217  
SAMEA3907221  
SAMEA3907222  
SAMEA3907231  
SAMEA3907234  
SAMEA3907237  
SAMEA3907238  
SAMEA3907241  
SAMEA3907243  
SAMEA3907260  
SAMEA3907264  
SAMEA3907267  
SAMEA3907271  
SAMEA3907276  
SAMEA3907279  
SAMEA3907280  
SAMEA3907281  
SAMEA3907282  
SAMEA3907286  
SAMEA3907287  
SAMEA3907289  
SAMEA3907293  
SAMEA3907304  
SAMEA3907305  
SAMEA3907306  
SAMEA3907362  
SAMEA3907363  
SAMEA3907365  
SAMEA3907368  
SAMEA3907369  
SAMEA3907380  
SAMEA3907382  
SAMEA3907388  
SAMEA3907389  
SAMEA3907400  
SAMEA3907401  
SAMEA3907403  
SAMEA3907407

SAMEA3907409  
SAMEA3907411  
SAMEA3907412  
SAMEA3907413  
SAMEA3907414  
SAMEA3907419  
SAMEA3907420  
SAMEA3907421  
SAMEA3907427  
SAMEA3907428  
SAMEA3910718  
SAMEA3910719  
SAMEA3910747  
SAMEA3910756  
SAMEA3910758  
SAMEA3928139  
SAMEA3928140  
SAMEA3928141  
SAMEA3928142  
SAMEA3928143  
SAMEA3928144  
SAMEA3928145  
SAMEA3928146  
SAMEA3940300  
SAMEA3994036  
SAMEA3994037  
SAMEA3994038  
SAMEA4040708  
SAMEA4040709  
SAMEA4040710  
SAMEA4040711  
SAMEA4346711  
SAMEA4504820  
SAMEA4504821  
SAMEA4504822  
SAMEA4504823  
SAMEA4504824  
SAMEA4504825  
SAMEA4504826  
SAMEA4504827  
SAMEA4504828  
SAMEA4504829  
SAMEA4504830  
SAMEA4504831

SAMEA4504832  
SAMEA4504833  
SAMEA4504834  
SAMEA4504835  
SAMEA4504837  
SAMEA4504838  
SAMEA4504839  
SAMEA4504840  
SAMEA4505489  
SAMEA4505490  
SAMEA4505491  
SAMEA4505492  
SAMEA4505493  
SAMEA4505494  
SAMEA4505495  
SAMEA4505496  
SAMEA4505497  
SAMEA4505498  
SAMEA4505499  
SAMEA4505500  
SAMEA4505501  
SAMEA4506885  
SAMEA4506886  
SAMEA4506887  
SAMEA4506888  
SAMEA4506889  
SAMEA4506890  
SAMEA4506891  
SAMEA4506892  
SAMEA4506893  
SAMEA4506894  
SAMEA4506895  
SAMEA4506896  
SAMEA4506897  
SAMEA4506898  
SAMEA4506899  
SAMEA4506900  
SAMEA4506901  
SAMEA4506902  
SAMEA4509487  
SAMEA4509488  
SAMEA4509489  
SAMEA4509490  
SAMEA4509491

SAMEA4509492  
SAMEA4672966  
SAMEA4672967  
SAMEA4672968  
SAMEA4672969  
SAMEA4823343  
SAMEA4823353  
SAMEA4823354  
SAMEA4823355  
SAMEA4823356  
SAMEA4823357  
SAMEA4823358  
SAMEA4823360  
SAMEA4848665  
SAMEA4848666  
SAMEA4848667  
SAMEA4848669  
SAMEA4848670  
SAMEA4848671  
SAMEA4848672  
SAMEA4848673  
SAMEA4848674  
SAMEA4848675  
SAMEA4848676  
SAMEA4848677  
SAMEA4848678  
SAMEA4848679  
SAMEA4848680  
SAMEA4848681  
SAMEA4848682  
SAMEA4848683  
SAMEA4848690  
SAMEA4848691  
SAMEA4848692  
SAMEA4848693  
SAMEA4848694  
SAMEA4848695  
SAMEA4848696  
SAMEA4848697  
SAMEA4848698  
SAMEA4848700  
SAMEA4848701  
SAMEA4848702  
SAMEA4848703

SAMEA4848704  
SAMEA4848705  
SAMEA4848706  
SAMEA4848707  
SAMEA4848708  
SAMEA4848709  
SAMEA4848710  
SAMEA4848711  
SAMEA4848712  
SAMEA4848713  
SAMEA4848714  
SAMEA4867919  
SAMEA4867920  
SAMEA4867921  
SAMEA4867922  
SAMEA4867923  
SAMEA4867924  
SAMEA4867925  
SAMEA4867926  
SAMEA4867927  
SAMEA4867928  
SAMEA4867929  
SAMEA4867930  
SAMEA4867931  
SAMEA4867932  
SAMEA4867933  
SAMEA4867934  
SAMEA4867935  
SAMEA4867936  
SAMEA4873254  
SAMEA4949388  
SAMEA4949389  
SAMEA4949390  
SAMEA4966024  
SAMEA4966025  
SAMEA5059499  
SAMEA5059500  
SAMEA5059501  
SAMEA5059502  
SAMEA5059503  
SAMEA5059504  
SAMEA5059505  
SAMEA5059506  
SAMEA5059507



SAMEA5059508  
SAMEA5059509  
SAMEA5059510  
SAMEA5059511  
SAMEA5059514  
SAMEA5059515  
SAMEA5059516  
SAMEA5059517  
SAMEA5059518  
SAMEA5059520  
SAMEA5059521  
SAMEA5059522  
SAMEA5059523  
SAMEA5205215  
SAMEA5205216  
SAMEA5205217  
SAMEA5205218  
SAMEA5205219  
SAMEA5205220  
SAMEA5205221  
SAMEA5205222  
SAMEA5205223  
SAMEA5205224  
SAMEA5205225  
SAMEA5205226  
SAMEA5205227  
SAMEA5205228  
SAMEA5205229  
SAMEA5560215  
SAMEA5560216  
SAMEA5560217  
SAMEA5560218  
SAMEA5577245  
SAMEA5577246  
SAMEA5657392  
SAMEA5657394  
SAMEA5657395  
SAMEA5657396  
SAMEA5657397  
SAMEA5657398  
SAMEA5657399  
SAMEA5657400  
SAMEA5818551  
SAMEA5818552

SAMEA676101  
SAMEA676105  
SAMEA676114  
SAMEA676121  
SAMEA676122  
SAMEA72802168  
SAMEA72802918  
SAMN01737209  
SAMN01893932  
SAMN01908107  
SAMN01974486  
SAMN01974487  
SAMN01974488  
SAMN01974489  
SAMN01974490  
SAMN01974491  
SAMN01974492  
SAMN01974493  
SAMN01974494  
SAMN01974495  
SAMN02144216  
SAMN02144219  
SAMN02194722  
SAMN02194723  
SAMN02485564  
SAMN02485565  
SAMN02485566  
SAMN02485567  
SAMN02485568  
SAMN02485569  
SAMN02485570  
SAMN02485571  
SAMN02485572  
SAMN02485573  
SAMN02485574  
SAMN02485575  
SAMN02485576  
SAMN02485577  
SAMN02485578  
SAMN02485579  
SAMN02485580  
SAMN02485581  
SAMN02485582  
SAMN02485583

SAMN02485584  
SAMN02485585  
SAMN02485586  
SAMN02485587  
SAMN02485588  
SAMN02485589  
SAMN02485590  
SAMN02485591  
SAMN02485592  
SAMN02485593  
SAMN02485594  
SAMN02485595  
SAMN02485596  
SAMN02485597  
SAMN02485598  
SAMN02485599  
SAMN02485600  
SAMN02485601  
SAMN02485602  
SAMN02485603  
SAMN02485604  
SAMN02485605  
SAMN02485606  
SAMN02485607  
SAMN02485608  
SAMN02485609  
SAMN02485610  
SAMN02485611  
SAMN02485612  
SAMN02485613  
SAMN02485614  
SAMN02570458  
SAMN02585152  
SAMN02585153  
SAMN02585154  
SAMN02585155  
SAMN02585156  
SAMN02585157  
SAMN02585158  
SAMN02585159  
SAMN02585160  
SAMN02585161  
SAMN02585162  
SAMN02585163

SAMN02585164  
SAMN02585165  
SAMN02585166  
SAMN02585167  
SAMN02585168  
SAMN02585169  
SAMN02585170  
SAMN02585171  
SAMN02585172  
SAMN02585173  
SAMN02585174  
SAMN02585175  
SAMN02585176  
SAMN02585177  
SAMN02585178  
SAMN02585179  
SAMN02585180  
SAMN02585181  
SAMN02585182  
SAMN02585183  
SAMN02585184  
SAMN02585185  
SAMN02585186  
SAMN02585187  
SAMN02585188  
SAMN02585189  
SAMN02585190  
SAMN02585191  
SAMN02585192  
SAMN02585193  
SAMN02585194  
SAMN02585195  
SAMN02585196  
SAMN02585197  
SAMN02585198  
SAMN02585199  
SAMN02585200  
SAMN02585201  
SAMN02585202  
SAMN02585203  
SAMN02585204  
SAMN02585205  
SAMN02585206  
SAMN02585207

SAMN02585208  
SAMN02585209  
SAMN02585210  
SAMN02921304  
SAMN02921305  
SAMN02921306  
SAMN02921307  
SAMN02921308  
SAMN02921309  
SAMN03067872  
SAMN03067873  
SAMN03067874  
SAMN03067875  
SAMN03067876  
SAMN03067877  
SAMN03067878  
SAMN03067879  
SAMN03067880  
SAMN03067881  
SAMN03067882  
SAMN03067883  
SAMN03067884  
SAMN03067890  
SAMN03067891  
SAMN03067893  
SAMN03067894  
SAMN03067895  
SAMN03067896  
SAMN03068228  
SAMN03068229  
SAMN03068230  
SAMN03068231  
SAMN03168352  
SAMN03168353  
SAMN03168354  
SAMN03168355  
SAMN03168356  
SAMN03168357  
SAMN03168358  
SAMN03168359  
SAMN03168360  
SAMN03168361  
SAMN03168363  
SAMN03168364

SAMN03168365  
SAMN03168366  
SAMN03168367  
SAMN03168368  
SAMN03168369  
SAMN03168370  
SAMN03168371  
SAMN03168372  
SAMN03168373  
SAMN03168374  
SAMN03168375  
SAMN03168376  
SAMN03168377  
SAMN03168378  
SAMN03168379  
SAMN03168380  
SAMN03168381  
SAMN03168382  
SAMN03168383  
SAMN03168384  
SAMN03168385  
SAMN03168386  
SAMN03168387  
SAMN03168388  
SAMN03168389  
SAMN03168390  
SAMN03168391  
SAMN03168392  
SAMN03275921  
SAMN03275922  
SAMN03275923  
SAMN03275924  
SAMN03366708  
SAMN03801643  
SAMN03801644  
SAMN03801645  
SAMN03801646  
SAMN03801647  
SAMN03801648  
SAMN03801649  
SAMN03801650  
SAMN03801651  
SAMN03801652  
SAMN03801653

SAMN03801654  
SAMN03801655  
SAMN03801656  
SAMN03801657  
SAMN03801658  
SAMN03801659  
SAMN03801660  
SAMN03801661  
SAMN03801662  
SAMN03801663  
SAMN03801664  
SAMN03801665  
SAMN03801666  
SAMN03801667  
SAMN03801668  
SAMN03801669  
SAMN03801670  
SAMN03801671  
SAMN03801672  
SAMN03801673  
SAMN03801674  
SAMN03801675  
SAMN03801676  
SAMN03801677  
SAMN03801678  
SAMN03801679  
SAMN03801680  
SAMN03801681  
SAMN03801682  
SAMN03801683  
SAMN03801684  
SAMN03801685  
SAMN03801686  
SAMN03801687  
SAMN03801688  
SAMN03801689  
SAMN03801690  
SAMN03801691  
SAMN03801692  
SAMN03801693  
SAMN03801694  
SAMN04195504  
SAMN04195505  
SAMN04195506

SAMN04195507  
SAMN04195508  
SAMN04195509  
SAMN04195510  
SAMN04440505  
SAMN04440506  
SAMN04851101  
SAMN04851103  
SAMN04851104  
SAMN04852950  
SAMN04852951  
SAMN04852952  
SAMN04852953  
SAMN04852954  
SAMN04852955  
SAMN04852956  
SAMN04852957  
SAMN04852958  
SAMN04852959  
SAMN04852960  
SAMN04852961  
SAMN04884534  
SAMN04884535  
SAMN04908307  
SAMN04908308  
SAMN04908309  
SAMN04908310  
SAMN04908311  
SAMN05185373  
SAMN05185377  
SAMN05185379  
SAMN05185380  
SAMN05185382  
SAMN05185384  
SAMN05185385  
SAMN05185393  
SAMN05185394  
SAMN05185396  
SAMN05185397  
SAMN05185399  
SAMN05185400  
SAMN05185401  
SAMN05185404  
SAMN05356426



SAMN05356427  
SAMN05468142  
SAMN05468143  
SAMN05831101  
SAMN05831102  
SAMN05831103  
SAMN05831104  
SAMN06128270  
SAMN06128271  
SAMN06128272  
SAMN06128273  
SAMN06161404  
SAMN06167373  
SAMN06167374  
SAMN06167375  
SAMN06167376  
SAMN06167377  
SAMN06167378  
SAMN06167379  
SAMN06167380  
SAMN06167381  
SAMN06167382  
SAMN06167383  
SAMN06167384  
SAMN06167385  
SAMN06167386  
SAMN06167387  
SAMN06167388  
SAMN06167389  
SAMN06167390  
SAMN06167391  
SAMN06167392  
SAMN06167393  
SAMN06167394  
SAMN06214558  
SAMN06244664  
SAMN06244665  
SAMN06244666  
SAMN06244667  
SAMN06244668  
SAMN06608432  
SAMN06608434  
SAMN06608444  
SAMN06647475

SAMN06853971  
SAMN06853972  
SAMN06853973  
SAMN06853974  
SAMN06853975  
SAMN07205120  
SAMN07205121  
SAMN07205122  
SAMN07205123  
SAMN07205124  
SAMN07205125  
SAMN07313075  
SAMN07360925  
SAMN07360926  
SAMN07376261  
SAMN07376262  
SAMN07376263  
SAMN07376264  
SAMN07376265  
SAMN07376266  
SAMN07376267  
SAMN07376268  
SAMN07376269  
SAMN07376270  
SAMN07376271  
SAMN07376272  
SAMN07376273  
SAMN07419816  
SAMN08032746  
SAMN08035651  
SAMN08035652  
SAMN08035653  
SAMN08035654  
SAMN08035655  
SAMN08035656  
SAMN08035657  
SAMN08035658  
SAMN08035659  
SAMN08035660  
SAMN08132858  
SAMN08177877  
SAMN08872810  
SAMN08872813  
SAMN08872843

SAMN08872844  
SAMN08872845  
SAMN08872846  
SAMN08872847  
SAMN08872848  
SAMN08872849  
SAMN08872850  
SAMN08872851  
SAMN08872852  
SAMN08872853  
SAMN08872854  
SAMN08872855  
SAMN08872856  
SAMN08872857  
SAMN08872858  
SAMN08872859  
SAMN08872866  
SAMN08872867  
SAMN08872868  
SAMN08872869  
SAMN08872870  
SAMN08872871  
SAMN08872872  
SAMN08872873  
SAMN08872874  
SAMN08872875  
SAMN08872876  
SAMN08872877  
SAMN08872878  
SAMN08872879  
SAMN08872880  
SAMN08872881  
SAMN08872882  
SAMN08872905  
SAMN08872906  
SAMN08872908  
SAMN08872909  
SAMN08872913  
SAMN08872914  
SAMN08872915  
SAMN08872916  
SAMN08872917  
SAMN08872918  
SAMN08872919

SAMN08872920  
SAMN08872926  
SAMN08872976  
SAMN08873011  
SAMN08873012  
SAMN08873033  
SAMN08873034  
SAMN08873035  
SAMN08873036  
SAMN08873037  
SAMN08873038  
SAMN08873062  
SAMN08873112  
SAMN08873115  
SAMN08873116  
SAMN08873117  
SAMN08873128  
SAMN08873130  
SAMN08873139  
SAMN08873141  
SAMN08873142  
SAMN08873143  
SAMN08873144  
SAMN08873145  
SAMN08873146  
SAMN08873147  
SAMN08873148  
SAMN08873155  
SAMN08873160  
SAMN08873161  
SAMN08873162  
SAMN08873174  
SAMN08873175  
SAMN08873176  
SAMN08873177  
SAMN08873188  
SAMN08873199  
SAMN08873219  
SAMN08873220  
SAMN08873221  
SAMN08873222  
SAMN08873223  
SAMN08873224  
SAMN08873225

SAMN08873226  
SAMN08873227  
SAMN08873228  
SAMN08873229  
SAMN08873243  
SAMN08873244  
SAMN08873245  
SAMN08873246  
SAMN08873247  
SAMN08873251  
SAMN08873258  
SAMN08873262  
SAMN08873264  
SAMN08873270  
SAMN08873318  
SAMN08873319  
SAMN08873321  
SAMN08873322  
SAMN08873323  
SAMN08873328  
SAMN08873329  
SAMN08873330  
SAMN08873331  
SAMN08873332  
SAMN08873333  
SAMN08873334  
SAMN08873335  
SAMN08873336  
SAMN08873337  
SAMN08873338  
SAMN08873339  
SAMN08873423  
SAMN08873428  
SAMN08873429  
SAMN08873447  
SAMN08873448  
SAMN08873449  
SAMN08873450  
SAMN08873451  
SAMN08873452  
SAMN08873453  
SAMN08873454  
SAMN08873455  
SAMN08873456

SAMN08873457  
SAMN08873458  
SAMN08873459  
SAMN08873460  
SAMN08873461  
SAMN08873462  
SAMN08873463  
SAMN08873464  
SAMN08873465  
SAMN08873466  
SAMN08873467  
SAMN08873468  
SAMN08873469  
SAMN08873470  
SAMN08873471  
SAMN08873472  
SAMN08873473  
SAMN08873474  
SAMN08873475  
SAMN08873476  
SAMN08873477  
SAMN08873478  
SAMN08873479  
SAMN08873480  
SAMN08873481  
SAMN08873482  
SAMN08873483  
SAMN08873484  
SAMN08873485  
SAMN08873486  
SAMN08873487  
SAMN08873488  
SAMN08873489  
SAMN08873490  
SAMN08873491  
SAMN08873492  
SAMN08873493  
SAMN08873494  
SAMN08873495  
SAMN08873496  
SAMN08873497  
SAMN08873498  
SAMN08873499  
SAMN08873500

SAMN08873501  
SAMN08873502  
SAMN08873503  
SAMN08873504  
SAMN08873505  
SAMN08873506  
SAMN08873507  
SAMN08873508  
SAMN08873509  
SAMN08873510  
SAMN08873511  
SAMN08873512  
SAMN08873513  
SAMN08873515  
SAMN08873516  
SAMN08873517  
SAMN08873518  
SAMN08873519  
SAMN09430724  
SAMN09430725  
SAMN09430726  
SAMN09430727  
SAMN09435548  
SAMN09435549  
SAMN09845873  
SAMN09845874  
SAMN09882737  
SAMN09882738  
SAMN09882739  
SAMN10077097  
SAMN10077098  
SAMN10077099  
SAMN10167127  
SAMN10174932  
SAMN10174933  
SAMN10174936  
SAMN10386546  
SAMN10386547  
SAMN10386548  
SAMN10386549  
SAMN10386550  
SAMN10386551  
SAMN10386552  
SAMN10386553

SAMN10386554  
SAMN10386555  
SAMN10386556  
SAMN10386557  
SAMN10386558  
SAMN10386559  
SAMN10584881  
SAMN10740936  
SAMN10740937  
SAMN10740938  
SAMN10740939  
SAMN10740940  
SAMN10740941  
SAMN10740942  
SAMN10740943  
SAMN10740944  
SAMN10740945  
SAMN10740946  
SAMN10740947  
SAMN10740948  
SAMN10740949  
SAMN10740950  
SAMN10740951  
SAMN10740952  
SAMN10740953  
SAMN10740954  
SAMN10740955  
SAMN10740956  
SAMN10740957  
SAMN10740958  
SAMN10740959  
SAMN10740960  
SAMN10740961  
SAMN10740962  
SAMN10740963  
SAMN10740964  
SAMN10740965  
SAMN10740966  
SAMN10740967  
SAMN10740968  
SAMN10740969  
SAMN10740970  
SAMN10740971  
SAMN10740972



SAMN10740973  
SAMN10740974  
SAMN10740975  
SAMN10740976  
SAMN10740977  
SAMN10740978  
SAMN10740979  
SAMN10740980  
SAMN10740981  
SAMN10740982  
SAMN10740983  
SAMN10740984  
SAMN10740985  
SAMN10740986  
SAMN10740987  
SAMN10740988  
SAMN10740989  
SAMN10740990  
SAMN10740991  
SAMN10740992  
SAMN10740993  
SAMN10740994  
SAMN10740995  
SAMN10740996  
SAMN10740997  
SAMN10740998  
SAMN10740999  
SAMN10741000  
SAMN10741001  
SAMN10741002  
SAMN10741003  
SAMN10741004  
SAMN10741005  
SAMN10741006  
SAMN10741010  
SAMN10741011  
SAMN10741012  
SAMN10741013  
SAMN10741014  
SAMN10741015  
SAMN10741016  
SAMN10741017  
SAMN10741018  
SAMN10741019

SAMN10741020  
SAMN10741021  
SAMN10741022  
SAMN10741023  
SAMN10741024  
SAMN10741025  
SAMN10741026  
SAMN11079481  
SAMN11079482  
SAMN11079484  
SAMN11079485  
SAMN11079487  
SAMN11079488  
SAMN11079490  
SAMN11079491  
SAMN11079493  
SAMN11079494  
SAMN11079496  
SAMN11079499  
SAMN11079500  
SAMN11079502  
SAMN11079503  
SAMN11079505  
SAMN11079506  
SAMN11079508  
SAMN11079509  
SAMN11079511  
SAMN11079512  
SAMN11079514  
SAMN11079515  
SAMN11079517  
SAMN11079518  
SAMN11079520  
SAMN11079521  
SAMN11079523  
SAMN11079524  
SAMN11079526  
SAMN11079527  
SAMN11079529  
SAMN11079530  
SAMN11079532  
SAMN11079533  
SAMN11079535  
SAMN11079536

SAMN11079538  
SAMN11079539  
SAMN11079541  
SAMN11079542  
SAMN11079544  
SAMN11079545  
SAMN11079547  
SAMN11079548  
SAMN11079550  
SAMN11079551  
SAMN11526750  
SAMN11526776  
SAMN11526802  
SAMN11526829  
SAMN11775869  
SAMN11843684  
SAMN11843695  
SAMN11843698  
SAMN11843701  
SAMN11843702  
SAMN12347403  
SAMN12567870  
SAMN12567871  
SAMN12667790  
SAMN12999906  
SAMN12999907  
SAMN12999908  
SAMN12999909  
SAMN12999910  
SAMN12999911  
SAMN13133746  
SAMN13133747  
SAMN13133748  
SAMN13133749  
SAMN13133750  
SAMN13133751  
SAMN13133752  
SAMN13133753  
SAMN13133754  
SAMN13133755  
SAMN13133756  
SAMN13133757  
SAMN13133758  
SAMN13133759

SAMN13133760  
SAMN13133761  
SAMN13133762  
SAMN13133763  
SAMN13133764  
SAMN13133765  
SAMN13133766  
SAMN13133767  
SAMN13133768  
SAMN13133769  
SAMN13133770  
SAMN13133771  
SAMN13133772  
SAMN13133773  
SAMN13133774  
SAMN13133775  
SAMN13133776  
SAMN13133777  
SAMN13133778  
SAMN13133779  
SAMN13133780  
SAMN13133781  
SAMN13133782  
SAMN13133783  
SAMN13133784  
SAMN13133785  
SAMN13133786  
SAMN13133787  
SAMN13133788  
SAMN13133789  
SAMN13133790  
SAMN13133791  
SAMN13133792  
SAMN13133793  
SAMN13133794  
SAMN13133795  
SAMN13133796  
SAMN13133797  
SAMN13133798  
SAMN13133799  
SAMN13133800  
SAMN13133801  
SAMN13133802  
SAMN13133803

SAMN13133804  
SAMN13133805  
SAMN13133806  
SAMN13133807  
SAMN13133808  
SAMN13133809  
SAMN13133810  
SAMN13133811  
SAMN13133812  
SAMN13133813  
SAMN13133814  
SAMN13133815  
SAMN13133816  
SAMN13133817  
SAMN13133818  
SAMN13133819  
SAMN13133820  
SAMN13133821  
SAMN13133822  
SAMN13133823  
SAMN13133824  
SAMN13133825  
SAMN13133826  
SAMN13164793  
SAMN13164794  
SAMN13672482  
SAMN13672483  
SAMN12565076  
SAMN12565083  
SAMN12565067  
SAMN12565068  
SAMN12565084  
SAMN12565082  
SAMN12565075  
SAMN12565069  
SAMN12565070  
SAMN12565071  
SAMN12565077  
SAMEA5533140  
SAMEA5533142  
SAMEA5533152  
SAMEA5533154  
SAMEA5533158  
SAMEA6862978

SAMN14210382  
SAMN14210383  
SAMEA6862930  
SAMEA6862931  
SAMEA6862932  
SAMEA6862933  
SAMEA6862934  
SAMEA6862935  
SAMEA6862936  
SAMEA6862937  
SAMEA6862957  
SAMEA6862979  
SAMEA6862929  
SAMEA6862980  
SAMEA6862928  
SAMEA6862953  
SAMEA6862982  
SAMEA6862983  
SAMEA6862984  
SAMEA6862985  
SAMEA6862922  
SAMEA6862923  
SAMEA6862924  
SAMEA6862925  
SAMEA6862926  
SAMEA6862958  
SAMEA6862976  
SAMEA6862959  
SAMEA6862916  
SAMEA6862917  
SAMEA6862919  
SAMEA6862920  
SAMEA6862921  
SAMN07678141  
SAMEA6862938  
SAMEA6862974  
SAMEA6862971  
SAMEA6862972  
SAMEA6862973  
SAMN12565078  
SAMN12565079  
SAMEA6862962  
SAMEA6862963  
SAMEA6862964

SAMEA6862965  
SAMEA6862966  
SAMEA6862967  
SAMEA6862977  
SAMEA6862968  
SAMEA6862969  
SAMEA6862970  
SAMEA6862939  
SAMEA6862940  
SAMEA6862941  
SAMEA6862981  
SAMN14210381  
SAMN14210380  
SAMN14422718  
SAMEA6106878  
SAMEA6862915  
SAMEA6862942  
SAMN12565072  
SAMEA6862927  
SAMEA6862954  
SAMEA6862975  
SAMEA6862986  
SAMEA6862943  
SAMEA6862944  
SAMEA6862945  
SAMEA6862946  
SAMEA6862947  
SAMN14210375  
SAMN14210374  
SAMN15232436  
SAMN15232437  
SAMN15232438  
SAMEA6853305  
SAMEA6862960  
SAMEA6862961  
SAMN14210379  
SAMN14210378  
SAMEA6862948  
SAMEA6862949  
SAMEA6862950  
SAMEA6862951  
SAMN14210376  
SAMN14210377  
SAMN14820580

SAMN14820581  
SAMN14820582  
SAMN14820583  
SAMN14820584  
SAMN14820585  
SAMEA6862952  
SAMN12565080  
SAMN12565081  
SAMEA6862955  
SAMEA6862956  
SAMN15650959  
SAMN15650961  
SAMN15650963  
SAMN15650965  
SAMN15650967  
SAMN15650969  
SAMN14279123  
SAMEA7198602  
SAMEA7198603  
SAMEA7198604  
SAMEA7198605  
SAMEA7198606  
SAMEA7198607  
SAMEA7198608  
SAMEA7198609  
SAMEA7198610  
SAMEA7198611  
SAMEA7198612  
SAMEA7297163  
SAMEA7297164  
SAMEA7297165  
SAMEA7297166  
SAMEA7297167  
SAMEA7297169  
SAMEA7297170  
SAMN13269014  
SAMN13269015  
SAMN13269016  
SAMN13269017  
SAMN13269018  
SAMN13269019  
SAMN13269020  
SAMN13269021  
SAMN13269022



SAMN13269023  
SAMN13269024  
SAMN13269025  
SAMN13269026  
SAMN13269027  
SAMN13269028  
SAMN13269029  
SAMN13269030  
SAMN13269031  
SAMN13269032  
SAMN13269033  
SAMN13269034  
SAMN13269035  
SAMN13269036  
SAMN13269037  
SAMN13269038  
SAMN13269039  
SAMN13269040  
SAMN14478636  
SAMEA5857935  
SAMEA5857938  
SAMEA5857941  
SAMEA5857950  
SAMN02953603  
SAMN15625691  
SAMN15625692  
SAMN15625693  
SAMN15625694  
SAMN15625695  
SAMN15625696  
SAMN15625697  
SAMN15625698  
SAMN15625699  
SAMN15625700  
SAMN15625701  
SAMN15625702  
SAMN15625703  
SAMN15625704  
SAMN15625705  
SAMN15625706  
SAMN15625707  
SAMN15625708  
SAMN15625709  
SAMN15625710

SAMN15625711  
SAMN15625712  
SAMN15625713  
SAMN15625714  
SAMN15625715  
SAMN15625716  
SAMN15625717  
SAMN15625718  
SAMN15625719  
SAMN15625720  
SAMN15625721  
SAMN15625722  
SAMN15625723  
SAMN15625724  
SAMN15625725  
SAMN15625726  
SAMN15625727  
SAMN15625728  
SAMN15625729  
SAMN15625730  
SAMN15625731  
SAMN15625732  
SAMN15625733  
SAMN15625734  
SAMN15625735  
SAMN15625736  
SAMN15625737  
SAMN15625738  
SAMN15625739  
SAMN15625740  
SAMN15625741  
SAMN15625742  
SAMN15625743  
SAMN15625744  
SAMN15625745  
SAMN15625746  
SAMN15625747  
SAMN15625748  
SAMN15625749  
SAMN15625750  
SAMN15625751  
SAMN15625752  
SAMN15625753  
SAMN15625754

SAMN15625755  
SAMN15625756  
SAMN15625757  
SAMN15625758  
SAMN15625759  
SAMN15625760  
SAMN15625761  
SAMN15625762  
SAMN15625763  
SAMN15625764  
SAMN15625765  
SAMN15625766  
SAMN15625767  
SAMN15625768  
SAMN15625769  
SAMN15625770  
SAMN15625771  
SAMN15625772  
SAMN15625773  
SAMN15625774  
SAMN15625775  
SAMN15625776  
SAMN15625777  
SAMN15625778  
SAMN15625779  
SAMN15625780  
SAMN15625781  
SAMN15625782  
SAMN15625783  
SAMN15625784  
SAMN15625785  
SAMN15625786  
SAMN15625787  
SAMN15625788  
SAMN15625789  
SAMN15625790  
SAMN15625791  
SAMN15625792  
SAMN15625793  
SAMN15625794  
SAMN15625795  
SAMN15625796  
SAMN15625797  
SAMN15625798

SAMN15625799  
SAMN15625800  
SAMN15625801  
SAMN15625802  
SAMN15625803  
SAMN15625804  
SAMN15625805  
SAMN15625806  
SAMN15625807  
SAMN15625808  
SAMN15625809  
SAMN15625810  
SAMN15625811  
SAMN15625812  
SAMN15625813  
SAMN15625814  
SAMN15625815  
SAMN15625816  
SAMN15625817  
SAMN15625818  
SAMN15625819  
SAMN15625820  
SAMN15625821  
SAMN15625822  
SAMN15625823  
SAMN15625824  
SAMN15625825  
SAMN15625826  
SAMN15625827  
SAMN15625828  
SAMN15625829  
SAMN15625830  
SAMN15625831  
SAMN15625832  
SAMN15625833  
SAMN15625834  
SAMN15625835  
SAMN15625836  
SAMN15625837  
SAMN15625838  
SAMN15625839  
SAMN15625840  
SAMN15625841  
SAMN15625842

SAMN15625843  
SAMN15625844  
SAMN15625845  
SAMN15625846  
SAMN15625847  
SAMN15625848  
SAMN15625849  
SAMN15625850  
SAMN15625851  
SAMN15625852  
SAMN15625853  
SAMN15625854  
SAMN15625855  
SAMN15625856  
SAMN15625857  
SAMN15625858  
SAMN15625859  
SAMN15625860  
SAMN15625861  
SAMN15625862  
SAMN15625863  
SAMN15625864  
SAMN15625865  
SAMN15625866  
SAMN15625867  
SAMN15625868  
SAMN15625869  
SAMN15625870  
SAMN15625871  
SAMN15625872  
SAMN15625873  
SAMN15625874  
SAMN15625875  
SAMN15625876  
SAMN15625877  
SAMN15625878  
SAMN15625879  
SAMN15625880  
SAMN15625881  
SAMN15625882  
SAMN15625883  
SAMN15625884  
SAMN15625885  
SAMN15625886

SAMN15625887  
SAMN15625888  
SAMN15625889  
SAMN15625890  
SAMN15625891  
SAMN15625892  
SAMN15625893  
SAMN15625894  
SAMN15625895  
SAMN15625896  
SAMN15625897  
SAMN15625898  
SAMN15625899  
SAMN15625900  
SAMN15625901  
SAMN15625902  
SAMN15625903  
SAMN15625904  
SAMN15625905  
SAMN15625906  
SAMN15625907  
SAMN15625908  
SAMN15625909  
SAMN15625910  
SAMN15625911  
SAMN15625912  
SAMN15625913  
SAMN15625914  
SAMN15625915  
SAMN15625916  
SAMN15625917  
SAMN15625918  
SAMN15625919  
SAMN15625920  
SAMN15625921  
SAMN15625922  
SAMN15625923  
SAMN15625924  
SAMN15625925  
SAMN15625926  
SAMN15625927  
SAMN15625928  
SAMN15625929  
SAMN15625930

SAMN15625931  
SAMN15625932  
SAMN15625933  
SAMN15625934  
SAMN15625935  
SAMN15625936  
SAMN15625937  
SAMN15625938  
SAMN15625939  
SAMN15625940  
SAMN15625941  
SAMN15625942  
SAMN15625943  
SAMN15625944  
SAMN15625945  
SAMN15625946  
SAMN15625947  
SAMN15625948  
SAMN15625949  
SAMN15625950  
SAMN15625951  
SAMN15625952  
SAMN15625953  
SAMN15625954  
SAMN15625955  
SAMN15625956  
SAMN15625957  
SAMN15625958  
SAMN15625959  
SAMN15625960  
SAMN15625961  
SAMN15625962  
SAMN15625963  
SAMN15625964  
SAMN15625965  
SAMN15625966  
SAMN15625967  
SAMN15625968  
SAMN15625969  
SAMN15625970  
SAMN15625971  
SAMN15625972  
SAMN15625973  
SAMN15625974

SAMN15625975  
SAMN15625976  
SAMN15625977  
SAMN15625978  
SAMN15625979  
SAMN15625980  
SAMN15625981  
SAMN15625982  
SAMN15625983  
SAMN15625984  
SAMN15625985  
SAMN15625986  
SAMN15625987  
SAMN15625988  
SAMN15625989  
SAMN15625990  
SAMN15625991  
SAMN15625992  
SAMN15625993  
SAMN15625994  
SAMN15625995  
SAMN15625996  
SAMN15625997  
SAMN15625998  
SAMN15625999  
SAMN15626000  
SAMN15626001  
SAMN15626002  
SAMN15626003  
SAMN15626004  
SAMN15626005  
SAMN15626006  
SAMN15626007  
SAMN15626008  
SAMN15626009  
SAMN15626010  
SAMN15626011  
SAMN15626012  
SAMN15626013  
SAMN15626014  
SAMN15626015  
SAMN15626016  
SAMN15626017  
SAMN15626018



SAMN15626019  
SAMN15626020  
SAMN15626021  
SAMN15626022  
SAMN15626023  
SAMN15626024  
SAMN15626025  
SAMN15626026  
SAMN15626027  
SAMN15626028  
SAMN15626029  
SAMN15626030  
SAMN15626031  
SAMN15626032  
SAMN15626033  
SAMN15626034  
SAMN15626035  
SAMN15626036  
SAMN15626037  
SAMN15626038  
SAMN15626039  
SAMN15626040  
SAMN15626041  
SAMN15626042  
SAMN15626043  
SAMN15626044  
SAMN15626045  
SAMN15626046  
SAMN15626047  
SAMN15626048  
SAMN15626049  
SAMN15626050  
SAMN15626051  
SAMN15626052  
SAMN15626053  
SAMN15626054  
SAMN15626055  
SAMN15626056  
SAMN15626057  
SAMN15626058  
SAMN15626059  
SAMN15626060  
SAMN15626061  
SAMN15626062

SAMN15626063  
SAMN15626064  
SAMN15626065  
SAMN15626066  
SAMN15626067  
SAMN15626068  
SAMN15626069  
SAMN15626070  
SAMN15626071  
SAMN15626072  
SAMN15626073  
SAMN15626074  
SAMN15626075  
SAMN15626076  
SAMN15626077  
SAMN16976490  
SAMN16981799  
SAMN15928267  
SAMN17045980  
SAMN17045981  
SAMN17045982  
SAMN17045983  
SAMN17045984  
SAMN17045985  
SAMN17045986  
SAMN17045987  
SAMN17045988  
SAMN17045989  
SAMN17045990  
SAMN17045991  
SAMN17045992  
SAMN17045993  
SAMN17045994  
SAMN17045995  
SAMN17045996  
SAMN17045997  
SAMN17045998  
SAMN17045999  
SAMN17046000  
SAMN17046001  
SAMN17046002  
SAMN17046003  
SAMN17046004  
SAMN17046005

SAMN17046006  
SAMN17046007  
SAMN17046008  
SAMN17046009  
SAMN17046010  
SAMN17046011  
SAMN17046012  
SAMN17046013  
SAMN17046014  
SAMN17046015  
SAMN17046016  
SAMN17046017  
SAMN17046018  
SAMN17046019  
SAMN17046020  
SAMN17046021  
SAMN17046022  
SAMN17046023  
SAMN17046024  
SAMN17046025  
SAMN17046026  
SAMN17046027  
SAMN17046028  
SAMN17046029  
SAMN17046030  
SAMN17046031  
SAMN17046032  
SAMN17046033  
SAMN17046034  
SAMN17046035  
SAMN17046036  
SAMN17046037  
SAMN17046038  
SAMN17046039  
SAMN17046040  
SAMN17046041  
SAMN17046042  
SAMN17046043  
SAMN17046044  
SAMN17046045  
SAMN17046046  
SAMN17046047  
SAMN17046048  
SAMN17046049

SAMN17046050  
SAMN17046051  
SAMN17046052  
SAMN17046053  
SAMN17046054  
SAMN17046055  
SAMN17046056  
SAMN17046057  
SAMN17046058  
SAMN17046059  
SAMN17046060  
SAMN17046061  
SAMN17046062  
SAMN17046063  
SAMN17046064  
SAMN17046065  
SAMN17046066  
SAMN17046067  
SAMN17046068  
SAMN17046069  
SAMN17046070  
SAMN17046071  
SAMN17046072  
SAMN24256746  
SAMN24256747  
SAMN24256748  
SAMN24256749  
SAMN24256750  
SAMN24256751  
SAMN24256752  
SAMN24256753  
SAMN24256754  
SAMN24256755  
SAMN24256756  
SAMN24256757  
SAMN24256758  
SAMN24256759  
SAMN24256760  
SAMN24256761  
SAMN24256762  
SAMN24256763  
SAMN24256764  
SAMN24256765  
SAMN24256766

SAMN24256767  
SAMN24256768  
SAMN24256769  
SAMN24256770  
SAMN24256771  
SAMN24256772  
SAMN24256773  
SAMN24256774  
SAMN24256775  
SAMN24256776  
SAMN24256777  
SAMEA104139329  
SAMEA104283460  
SAMEA104283461  
SAMEA104283462  
SAMEA104283463  
SAMEA104283464  
SAMEA104283465  
SAMEA104283466  
SAMEA104283467  
SAMEA104283468  
SAMEA104283469  
SAMEA104283470  
SAMEA104283471  
SAMEA104283472  
SAMEA104283473  
SAMEA104363589  
SAMEA104363593  
SAMEA104363604  
SAMEA104363610  
SAMEA104363614  
SAMEA47266168  
SAMEA4823359  
SAMEA4848668  
SAMEA5204132  
SAMEA5204133  
SAMEA5204134  
SAMEA5204135  
SAMEA5205212  
SAMEA5205213  
SAMEA5205214  
SAMEA5209170  
SAMEA5209171  
SAMEA5209172

SAMEA5209173  
SAMEA5209174  
SAMEA5209175  
SAMEA5209176  
SAMEA5209177  
SAMEA5209178  
SAMEA5209179  
SAMEA5209180  
SAMEA5209181  
SAMEA5209182  
SAMEA5209183  
SAMEA5209184  
SAMEA5209185  
SAMEA5209186  
SAMEA5209187  
SAMEA5209188  
SAMEA5209189  
SAMEA5209190  
SAMEA5209191  
SAMEA5209192  
SAMEA5209193  
SAMEA5209194  
SAMEA5209195  
SAMEA5209196  
SAMEA5209197  
SAMEA5209198  
SAMEA5209199  
SAMEA5209200  
SAMEA5209201  
SAMEA5209202  
SAMEA5209203  
SAMEA5857937  
SAMEA5857945  
SAMEA6246836  
SAMEA6246837  
SAMEA6246838  
SAMEA6246839  
SAMEA6246840  
SAMEA6246841  
SAMEA6246842  
SAMEA6246843  
SAMEA6246844  
SAMEA6246845  
SAMEA6246846

SAMEA6246847  
SAMEA6246848  
SAMEA6246849  
SAMEA6246850  
SAMEA6246851  
SAMEA6246852  
SAMEA6246853  
SAMEA6246854  
SAMEA6246855  
SAMEA6246856  
SAMEA6246857  
SAMEA6246858  
SAMEA8157152  
SAMEA8157153  
SAMEA8157154  
SAMEA8157155  
SAMEA8157156  
SAMEA8157157  
SAMEA8157158  
SAMEA8157159  
SAMEA8157160  
SAMEA8157161  
SAMEA8157162  
SAMEA8157163  
SAMEA8157164  
SAMEA8157165  
SAMEA8157166  
SAMEA8157167  
SAMEA8157168  
SAMEA8157169  
SAMEA8157170  
SAMEA8157171  
SAMEA8157172  
SAMEA8157173  
SAMEA8157174  
SAMEA8157175  
SAMEA8157176  
SAMEA8157177  
SAMEA8157178  
SAMEA8157179  
SAMEA8157180  
SAMEA8157181  
SAMEA8157182  
SAMEA8157183

SAMEA8157184  
SAMEA8157185  
SAMEA8157186  
SAMEA8157187  
SAMEA8157188  
SAMEA8157189  
SAMEA8157190  
SAMEA8157191  
SAMEA8157192  
SAMEA8230809  
SAMEA8230810  
SAMEA8230811  
SAMEA8230812  
SAMEA8230813  
SAMEA8230814  
SAMEA8230815  
SAMEA8230816  
SAMEA8230817  
SAMEA8230818  
SAMEA8230819  
SAMN17138390  
SAMN17192040  
SAMN17192041  
SAMN17192042  
SAMN17192043  
SAMN17192044  
SAMN17192045  
SAMN17192046  
SAMN17192047  
SAMN17192048  
SAMN17192049  
SAMN17192050  
SAMN17192051  
SAMN17192052  
SAMN17192053  
SAMN17192054  
SAMN17192055  
SAMN17192056  
SAMN17192057  
SAMN17192058  
SAMN17192059  
SAMN17192060  
SAMN17192061  
SAMN17192062



SAMN17192063  
SAMN17192064  
SAMN17192065  
SAMN17192066  
SAMN17192067  
SAMN17192068  
SAMN17192069  
SAMN17192070  
SAMN17192071  
SAMN17192072  
SAMN17192073  
SAMN17192074  
SAMN17192075  
SAMN17192076  
SAMN17192077  
SAMN17192078  
SAMN17192079  
SAMN17192080  
SAMN17192081  
SAMN17192082  
SAMN17192083  
SAMN17192084  
SAMN17192085  
SAMN17192086  
SAMN17192087  
SAMN17192088  
SAMN17192089  
SAMN17192090  
SAMN17192091  
SAMN17192092  
SAMN17192093  
SAMN17192094  
SAMN17192095  
SAMN17192096  
SAMN17192097  
SAMN17192098  
SAMN17192099  
SAMN17192100  
SAMN17192101  
SAMN17192102  
SAMN17192103  
SAMN17192104  
SAMN17192105  
SAMN17192106

SAMN17192107  
SAMN17192108  
SAMN17192109  
SAMN17192110  
SAMN17192111  
SAMN17192112  
SAMN17192113  
SAMN17192114  
SAMN17192115  
SAMN17192116  
SAMN17192117  
SAMN17192118  
SAMN17192119  
SAMN17192120  
SAMN17192121  
SAMN17192122  
SAMN17192123  
SAMN17192124  
SAMN17192125  
SAMN17192126  
SAMN17192127  
SAMN17192128  
SAMN17192129  
SAMN17192130  
SAMN17192131  
SAMN12574852  
SAMN17983068  
SAMEA104090975  
SAMEA104090976  
SAMEA104090977  
SAMEA104090978  
SAMEA104090979  
SAMEA104090980  
SAMEA104090981  
SAMEA104090982  
SAMEA104090983  
SAMEA104090984  
SAMEA104090985  
SAMEA104090986  
SAMEA104090987  
SAMEA104090988  
SAMEA104090989  
SAMEA104090990  
SAMEA104090991

SAMEA104090992  
SAMEA104090993  
SAMEA104090994  
SAMEA104090995  
SAMEA104090996  
SAMEA104090997  
SAMEA104090998  
SAMEA104090999  
SAMEA104091000  
SAMEA104091001  
SAMEA104091002  
SAMEA104091003  
SAMEA104091004  
SAMEA104091005  
SAMEA104091006  
SAMEA104091007  
SAMEA104091008  
SAMEA104091009  
SAMEA104091010  
SAMEA104091011  
SAMEA104091012  
SAMEA104091013  
SAMEA104091014  
SAMEA104091015  
SAMEA104091016  
SAMEA104091017  
SAMEA104091018  
SAMEA104091019  
SAMEA104091020  
SAMEA104091021  
SAMEA104091022  
SAMEA104091023  
SAMEA104091024  
SAMEA104091025  
SAMEA104091026  
SAMEA104091027  
SAMEA104091028  
SAMEA104091029  
SAMEA104091030  
SAMEA104091031  
SAMEA104091032  
SAMEA104091033  
SAMEA104091034  
SAMEA104091035

SAMEA104091036  
SAMEA104091037  
SAMEA104091038  
SAMEA104091039  
SAMEA104091040  
SAMEA104091041  
SAMEA104091042  
SAMEA104091043  
SAMEA104091044  
SAMEA104091045  
SAMEA104091046  
SAMEA104091047  
SAMEA104091048  
SAMEA104091049  
SAMEA104091050  
SAMEA104091051  
SAMEA104091052  
SAMEA104091053  
SAMEA104091054  
SAMEA104091055  
SAMEA104091056  
SAMEA104091057  
SAMEA104091058  
SAMEA104091059  
SAMEA104091060  
SAMEA104091061  
SAMEA104091062  
SAMEA104091063  
SAMEA104091064  
SAMEA104091065  
SAMEA104091066  
SAMEA104091067  
SAMEA104091068  
SAMEA104091069  
SAMEA104091070  
SAMEA104091071  
SAMEA4853016  
SAMEA4853017  
SAMEA4853018  
SAMEA4853019  
SAMEA4853020  
SAMEA4853021  
SAMEA4853022  
SAMEA4853023

SAMEA4853024  
SAMEA4853025  
SAMEA4853026  
SAMEA4853027  
SAMEA4853028  
SAMEA4853029  
SAMEA4853030  
SAMEA4853031  
SAMEA4853032  
SAMEA4853033  
SAMEA4853034  
SAMEA4853035  
SAMEA4853036  
SAMEA4853037  
SAMEA4853038  
SAMEA4853039  
SAMEA4853040  
SAMEA4853041  
SAMEA4853042  
SAMEA4853043  
SAMEA4853044  
SAMEA4853045  
SAMEA4853046  
SAMEA4853047  
SAMEA4853048  
SAMEA4853049  
SAMEA4853050  
SAMEA4853051  
SAMEA4853052  
SAMEA4853053  
SAMEA4853054  
SAMEA4853055  
SAMEA4853056  
SAMEA4853057  
SAMEA4853058  
SAMEA4853059  
SAMEA4853060  
SAMEA4853061  
SAMEA4853062  
SAMEA4853063  
SAMEA4853064  
SAMEA4853065  
SAMEA4853066  
SAMEA4853067

SAMEA4853068  
SAMEA4853069  
SAMEA4853070  
SAMEA4853071  
SAMEA4853072  
SAMEA4853073  
SAMEA4853074  
SAMEA4853075  
SAMEA4853076  
SAMEA4853077  
SAMEA4853078  
SAMEA4853079  
SAMEA4853080  
SAMEA4853081  
SAMEA4853082  
SAMEA4853083  
SAMEA4853084  
SAMEA4853085  
SAMEA4853086  
SAMEA4853087  
SAMEA4853088  
SAMEA4853089  
SAMEA4853090  
SAMEA5883546  
SAMEA5883547  
SAMEA5883548  
SAMEA5883549  
SAMEA7038685  
SAMEA7038686  
SAMEA7038687  
SAMEA7038688  
SAMEA7038689  
SAMEA7038690  
SAMEA7038691  
SAMEA7038692  
SAMEA7038693  
SAMEA7038694  
SAMEA7038695  
SAMEA7038696  
SAMEA7038697  
SAMEA7038698  
SAMEA7038699  
SAMEA7038700  
SAMEA7038701

SAMEA7038702  
SAMEA7038703  
SAMEA7038704  
SAMEA7038705  
SAMEA7038706  
SAMEA7038707  
SAMEA7038708  
SAMEA7038709  
SAMEA7038710  
SAMEA7038711  
SAMEA7038712  
SAMEA7038713  
SAMEA7038714  
SAMEA7038715  
SAMEA7038716  
SAMEA7038717  
SAMEA7038718  
SAMEA7038719  
SAMEA7038720  
SAMEA7038721  
SAMEA7038722  
SAMEA7091403  
SAMN02921310  
SAMN02921311  
SAMN02921312  
SAMN02921313  
SAMN02921314  
SAMN02921315  
SAMN02921316  
SAMN02921317  
SAMN02921318  
SAMN02921319  
SAMN02921320  
SAMN02921321  
SAMN02921322  
SAMN03168393  
SAMN03168394  
SAMN03168395  
SAMN03168396  
SAMN03168397  
SAMN03168398  
SAMN03168399  
SAMN03168400  
SAMN03366710

SAMN03366711  
SAMN03366712  
SAMN04209256  
SAMN05439959  
SAMN05791668  
SAMN06167395  
SAMN06167396  
SAMN06219538  
SAMN06219539  
SAMN08005341  
SAMN08005342  
SAMN09708541  
SAMN10174929  
SAMN10174938  
SAMN10174939  
SAMN10174940  
SAMN10174943  
SAMN10174944  
SAMN10174946  
SAMN10174953  
SAMN10174954  
SAMN10174955  
SAMN10180428  
SAMN10180429  
SAMN10180430  
SAMN10180431  
SAMN10246085  
SAMN10246086  
SAMN10246087  
SAMN10246088  
SAMN10246089  
SAMN10246090  
SAMN10246091  
SAMN10246092  
SAMN10246093  
SAMN10246094  
SAMN10246095  
SAMN10246096  
SAMN10662571  
SAMN10662572  
SAMN10662573  
SAMN10662574  
SAMN10662575  
SAMN10662576



SAMN10662577  
SAMN10662578  
SAMN10662579  
SAMN10662580  
SAMN10662581  
SAMN10662582  
SAMN10662583  
SAMN10662584  
SAMN10662585  
SAMN10662586  
SAMN10662587  
SAMN10662588  
SAMN10662589  
SAMN10662590  
SAMN10662591  
SAMN10741007  
SAMN10741008  
SAMN10741009  
SAMN11407875  
SAMN11407876  
SAMN11407877  
SAMN11407878  
SAMN11407879  
SAMN11407880  
SAMN11787846  
SAMN11787847  
SAMN11787848  
SAMN11787849  
SAMN11787850  
SAMN12565073  
SAMN12565074  
SAMN12565085  
SAMN17023496  
SAMN17023497  
SAMN17023498  
SAMN17023499  
SAMN17023500  
SAMN17023501  
SAMN17023502  
SAMN17023503  
SAMN17023504  
SAMN17023505  
SAMN17023506  
SAMN17023507

SAMN17023514  
SAMN17023515  
SAMN17023516  
SAMN17023517  
SAMN17023518  
SAMN17023519  
SAMN17023520  
SAMN17023521  
SAMN19522949  
SAMN19522963  
SAMEA8797069  
SAMEA8797070  
SAMEA8797071  
SAMEA8797072  
SAMEA8797073  
SAMEA8797074  
SAMEA8797075  
SAMEA8797076  
SAMEA8797077  
SAMEA8797078  
SAMEA8797079  
SAMEA8797080  
SAMEA8797081  
SAMEA8797082  
SAMEA8797083  
SAMEA8797084  
SAMEA8797086  
SAMEA8797087  
SAMEA8797088  
SAMEA8797089  
SAMEA8797090  
SAMEA8797091  
SAMEA8797092  
SAMEA8797093  
SAMEA8797094  
SAMEA8797095  
SAMEA8797096  
SAMN17023483  
SAMN17023484  
SAMN17023485  
SAMN17023486  
SAMN17023487  
SAMN17023488  
SAMN17023489

SAMN17023490  
SAMN17023491  
SAMN17023492  
SAMN17023493  
SAMN17023494  
SAMN17023495  
SAMN17023508  
SAMN17023509  
SAMN17023510  
SAMN17023511  
SAMN17023512  
SAMN17023513  
SAMN18937658  
SAMN19522718  
SAMN19522719  
SAMN19522720  
SAMN19522721  
SAMN19522722  
SAMN19522723  
SAMN19522724  
SAMN19522725  
SAMN19522726  
SAMN19522727  
SAMN19522728  
SAMN19522729  
SAMN19522730  
SAMN19522731  
SAMN19522732  
SAMN19522733  
SAMN19522734  
SAMN19522735  
SAMN19522736  
SAMN19522737  
SAMN19522738  
SAMN19522739  
SAMN19522740  
SAMN19522741  
SAMN19522742  
SAMN19522743  
SAMN19522744  
SAMN19522745  
SAMN19522746  
SAMN19522747  
SAMN19522748

SAMN19522749  
SAMN19522750  
SAMN19522751  
SAMN19522752  
SAMN19522753  
SAMN19522754  
SAMN19522755  
SAMN19522756  
SAMN19522757  
SAMN19522758  
SAMN19522759  
SAMN19522760  
SAMN19522761  
SAMN19522762  
SAMN19522763  
SAMN19522764  
SAMN19522765  
SAMN19522766  
SAMN19522767  
SAMN19522768  
SAMN19522769  
SAMN19522770  
SAMN19522771  
SAMN19522772  
SAMN19522773  
SAMN19522774  
SAMN19522775  
SAMN19522776  
SAMN19522777  
SAMN19522778  
SAMN19522779  
SAMN19522780  
SAMN19522781  
SAMN19522782  
SAMN19522783  
SAMN19522784  
SAMN19522785  
SAMN19522786  
SAMN19522787  
SAMN19522788  
SAMN19522789  
SAMN19522790  
SAMN19522791  
SAMN19522792

SAMN19522793  
SAMN19522794  
SAMN19522795  
SAMN19522796  
SAMN19522797  
SAMN19522798  
SAMN19522799  
SAMN19522800  
SAMN19522801  
SAMN19522802  
SAMN19522803  
SAMN19522804  
SAMN19522805  
SAMN19522806  
SAMN19522807  
SAMN19522808  
SAMN19522809  
SAMN19522810  
SAMN19522811  
SAMN19522812  
SAMN19522813  
SAMN19522814  
SAMN19522815  
SAMN19522816  
SAMN19522817  
SAMN19522818  
SAMN19522819  
SAMN19522820  
SAMN19522821  
SAMN19522822  
SAMN19522823  
SAMN19522824  
SAMN19522825  
SAMN19522826  
SAMN19522827  
SAMN19522828  
SAMN19522829  
SAMN19522830  
SAMN19522831  
SAMN19522832  
SAMN19522833  
SAMN19522834  
SAMN19522835  
SAMN19522836

SAMN19522837  
SAMN19522838  
SAMN19522839  
SAMN19522840  
SAMN19522841  
SAMN19522842  
SAMN19522843  
SAMN19522844  
SAMN19522845  
SAMN19522846  
SAMN19522847  
SAMN19522848  
SAMN19522849  
SAMN19522850  
SAMN19522851  
SAMN19522852  
SAMN19522853  
SAMN19522854  
SAMN19522855  
SAMN19522856  
SAMN19522857  
SAMN19522858  
SAMN19522859  
SAMN19522860  
SAMN19522861  
SAMN19522862  
SAMN19522863  
SAMN19522864  
SAMN19522865  
SAMN19522866  
SAMN19522867  
SAMN19522868  
SAMN19522869  
SAMN19522870  
SAMN19522871  
SAMN19522872  
SAMN19522873  
SAMN19522874  
SAMN19522875  
SAMN19522876  
SAMN19522877  
SAMN19522878  
SAMN19522879  
SAMN19522880

SAMN19522881  
SAMN19522882  
SAMN19522883  
SAMN19522884  
SAMN19522885  
SAMN19522886  
SAMN19522887  
SAMN19522888  
SAMN19522889  
SAMN19522890  
SAMN19522891  
SAMN19522892  
SAMN19522893  
SAMN19522894  
SAMN19522895  
SAMN19522896  
SAMN19522897  
SAMN19522898  
SAMN19522899  
SAMN19522900  
SAMN19522901  
SAMN19522902  
SAMN19522903  
SAMN19522904  
SAMN19522905  
SAMN19522906  
SAMN19522907  
SAMN19522908  
SAMN19522909  
SAMN19522910  
SAMN19522911  
SAMN19522912  
SAMN19522913  
SAMN19522914  
SAMN19522915  
SAMN19522916  
SAMN19522917  
SAMN19522918  
SAMN19522919  
SAMN19522920  
SAMN19522921  
SAMN19522922  
SAMN19522923  
SAMN19522924

SAMN19522925  
SAMN19522926  
SAMN19522927  
SAMN19522928  
SAMN19522929  
SAMN19522930  
SAMN19522931  
SAMN19522932  
SAMN19522933  
SAMN19522934  
SAMN19522935  
SAMN19522936  
SAMN19522937  
SAMN19522938  
SAMN19522939  
SAMN19522940  
SAMN19522941  
SAMN19522942  
SAMN19522943  
SAMN19522944  
SAMN19522945  
SAMN19522946  
SAMN19522947  
SAMN19522948  
SAMN19522956  
SAMN19522957  
SAMN19522962  
SAMEA7532748  
SAMN17849183  
SAMEA5875974  
SAMEA5875975  
SAMEA5875976  
SAMEA5875977  
SAMEA5875978  
SAMEA5875979  
SAMEA5875980  
SAMEA5875981  
SAMEA5875982  
SAMEA5875983  
SAMEA8008129  
SAMEA8008130  
SAMEA8008131  
SAMEA8008132  
SAMEA8008133



SAMEA8008134  
SAMEA8008135  
SAMEA8008136  
SAMEA8008137  
SAMEA8008138  
SAMEA8008139  
SAMEA8008140  
SAMEA8008141  
SAMEA8008142  
SAMEA8008143  
SAMEA8008144  
SAMEA8008145  
SAMEA8008146  
SAMEA8008147  
SAMEA8008148  
SAMEA8008149  
SAMEA8008150  
SAMEA8797085  
SAMN14824620  
SAMN14824621  
SAMN14824622  
SAMN14824623  
SAMN17378081  
SAMN17378082  
SAMN17378083  
SAMN17378084  
SAMN17378085  
SAMN17378092  
SAMN17378093  
SAMN17378094  
SAMN17378095  
SAMN17378098  
SAMN17378099  
SAMN17378104  
SAMN17378106  
SAMN17378108  
SAMN17378131  
SAMN17378132  
SAMN17378162  
SAMN17378165  
SAMN17378166  
SAMN17378181  
SAMN17378182  
SAMN17378185

SAMN17378190  
SAMN17378192  
SAMN17378225  
SAMN18253120  
SAMN20156216  
SAMN20156217  
SAMN20156218  
SAMN20156219  
SAMN20156220  
SAMN20833840  
SAMN20833841  
SAMN20833842  
SAMN20833843  
SAMN20833844  
SAMN20833845  
SAMN20833846  
SAMN20833847  
SAMN20833848  
SAMN20833849  
SAMN21035041  
SAMN21035042  
SAMN21035043  
SAMN21035044  
SAMN21035045  
SAMN21035046  
SAMN21035047  
SAMN21035048  
SAMN21035049  
SAMN21035050  
SAMN21035051  
SAMN21035052  
SAMN21035053  
SAMN21035054  
SAMN21035055  
SAMN21035056  
SAMN21035057  
SAMN21035058  
SAMN21035059  
SAMN21035060  
SAMN21035061  
SAMN21035062  
SAMN21035063  
SAMN21035064  
SAMN21035065

SAMN21035066  
SAMN21035067  
SAMN21035068  
SAMN21035069  
SAMN21035070  
SAMN21035071  
SAMN21035072  
SAMN21035073  
SAMN21035074  
SAMN21035075  
SAMN21035076  
SAMN21035077  
SAMN21035078  
SAMN21035079  
SAMN21035080  
SAMN21035081  
SAMN21035082  
SAMN21035083  
SAMN21035084  
SAMN21035085  
SAMN21035086  
SAMN21035087  
SAMN21035088  
SAMN21035089  
SAMN21035090  
SAMN21035091  
SAMN21035092  
SAMN21035093  
SAMN21035094  
SAMN21035095  
SAMN21035096  
SAMN21035097  
SAMN21035098  
SAMN21035099  
SAMN21035100  
SAMN21035101  
SAMN21035102  
SAMN21035103  
SAMN21035104  
SAMN21035105  
SAMN21035106  
SAMN21035107  
SAMN21035108  
SAMN21035109

SAMN21035110  
SAMN21035111  
SAMN21035112  
SAMN21035113  
SAMN21035114  
SAMN21035115  
SAMN21035116  
SAMN21035117  
SAMN21035118  
SAMN21035119  
SAMN21035120  
SAMN21035121  
SAMN21035122  
SAMN21035123  
SAMN21035124  
SAMN21035125  
SAMN21035126  
SAMN21035127  
SAMN21035128  
SAMN21035129  
SAMN21035130  
SAMN21035131  
SAMN21035132  
SAMN21035133  
SAMN21035134  
SAMN21035135  
SAMN21035136  
SAMN21035137  
SAMN21035138  
SAMN21035139  
SAMN21035140  
SAMN21035141  
SAMN21035142  
SAMN21035143  
SAMN21035144  
SAMN21035145  
SAMN21035146  
SAMN21035147  
SAMN21035148  
SAMN21035149  
SAMN21035150  
SAMN21035151  
SAMN21035152  
SAMN21035153

SAMN21035154  
SAMN21035155  
SAMN21035156  
SAMN21035157  
SAMN21035158  
SAMN21035159  
SAMN21035160  
SAMN21035161  
SAMN21035162  
SAMN21035163  
SAMN21035164  
SAMN21035165  
SAMN21035166  
SAMN21035167  
SAMN21035168  
SAMN21035169  
SAMN21035170  
SAMN21035171  
SAMN21035172  
SAMN21035173  
SAMN21035174  
SAMN21035175  
SAMN21035176  
SAMN21035177  
SAMN21035178  
SAMN21035179  
SAMN21035180  
SAMN21035181  
SAMN21035182  
SAMN21035183  
SAMN21035184  
SAMN21035185  
SAMN21035186  
SAMN21035187  
SAMN21035188  
SAMN21035189  
SAMN21035190  
SAMN21035191  
SAMN21035192  
SAMN21035193  
SAMN21035194  
SAMN21035195  
SAMN21035197  
SAMN21035198

SAMN21035199  
SAMN21035200  
SAMN21035201  
SAMN21035202  
SAMN21035203  
SAMN21035204  
SAMN21035205  
SAMN21035206  
SAMN21035207  
SAMN21035208  
SAMN21035209  
SAMN21035210  
SAMN21035211  
SAMN21035212  
SAMN21035213  
SAMN21035214  
SAMN21035215  
SAMN21035216  
SAMN21035217  
SAMN21035218  
SAMN21035219  
SAMN21035220  
SAMN21035221  
SAMN21035222  
SAMN21035223  
SAMN21035224  
SAMN21035225  
SAMN21035226  
SAMN21035227  
SAMN21035228  
SAMN21035229  
SAMN21035230  
SAMN21035231  
SAMN21035232  
SAMN21035233  
SAMN21035234  
SAMN21035235  
SAMN21035236  
SAMN21035237  
SAMN21035238  
SAMN21035239  
SAMN21035240  
SAMN21035241  
SAMN21035242

SAMN21035243  
SAMN21035244  
SAMN21035245  
SAMN21035246  
SAMN21035247  
SAMN21035248  
SAMN21035249  
SAMN21035250  
SAMN21035251  
SAMN21035252  
SAMN21035253  
SAMN21035254  
SAMN21035255  
SAMN21035256  
SAMN21035257  
SAMN21035258  
SAMN21035259  
SAMN21035260  
SAMN21035261  
SAMN21035262  
SAMN21035263  
SAMN21035264  
SAMN21035265  
SAMN21035266  
SAMN21035267  
SAMN21035268  
SAMN21035269  
SAMN21035270  
SAMN21035271  
SAMN21035272  
SAMN21035273  
SAMN21035274  
SAMN21035275  
SAMN21035276  
SAMN21035277  
SAMN21035278  
SAMN21035279  
SAMN21035280  
SAMN21035281  
SAMN21035282  
SAMN21035283  
SAMN21035284  
SAMN21035285  
SAMN21035286

SAMN21035287  
SAMN21035288  
SAMN21035289  
SAMN21035290  
SAMN21035291  
SAMN21035292  
SAMN21035293  
SAMN21035294  
SAMN21035295  
SAMN21035296  
SAMN21035297  
SAMN21035298  
SAMN21035299  
SAMN21035300  
SAMN21035301  
SAMN21035302  
SAMN21035303  
SAMN21035304  
SAMN21035305  
SAMN21035306  
SAMN21035307  
SAMN21035308  
SAMN21035309  
SAMN21035310  
SAMN21035311  
SAMN21035312  
SAMN21035313  
SAMN21035314  
SAMN21035315  
SAMN21035316  
SAMN21035317  
SAMN21035318  
SAMN21035319  
SAMN21035320  
SAMN21035321  
SAMN21035322  
SAMN21035323  
SAMN21035324  
SAMN21035325  
SAMN21035326  
SAMN21035327  
SAMN21035328  
SAMN21035329  
SAMN21035330



SAMN21035331  
SAMN21035332  
SAMN21035333  
SAMN21035334  
SAMN21035335  
SAMN21035336  
SAMN21035337  
SAMN21035338  
SAMN21035339  
SAMN21035340  
SAMN21035341  
SAMN21035342  
SAMN21035343  
SAMN21035344  
SAMN21035345  
SAMN21035346  
SAMN21035347  
SAMN21035348  
SAMN21035349  
SAMN21035350  
SAMN21035351  
SAMN21035352  
SAMN21035353  
SAMN21035354  
SAMN21035355  
SAMN21035356  
SAMN21035357  
SAMN21035358  
SAMN21035359  
SAMN21035360  
SAMN21035361  
SAMN21035362  
SAMN21035363  
SAMN21035364  
SAMN21035365  
SAMN21035366  
SAMN21035367  
SAMN21035368  
SAMN21035369  
SAMN21035370  
SAMN21035371  
SAMN21035372  
SAMN21035373  
SAMN21035374

SAMN21035375  
SAMN21035376  
SAMN21035377  
SAMN21035378  
SAMN21035379  
SAMN21035380  
SAMN21035381  
SAMN21035382  
SAMN21035383  
SAMN21035384  
SAMN21035385  
SAMN21035386  
SAMN21035387  
SAMN21035388  
SAMN21035389  
SAMN21035390  
SAMN21035391  
SAMN21035392  
SAMN21035393  
SAMN21035394  
SAMN21035395  
SAMN21035396  
SAMN21035397  
SAMN21035398  
SAMN21035399  
SAMN21035400  
SAMN21035401  
SAMN21035402  
SAMN21035403  
SAMN21035404  
SAMN21035405  
SAMN21035406  
SAMN21035407  
SAMN21035408  
SAMN21035409  
SAMN21035410  
SAMN21035411  
SAMN21035412  
SAMN21035413  
SAMN21035414  
SAMN21035415  
SAMN21035416  
SAMN21035417  
SAMN21035418

SAMN21035419  
SAMN21035420  
SAMN21035421  
SAMN21035422  
SAMN21035423  
SAMN21035424  
SAMN21035425  
SAMN21035426  
SAMN21035427  
SAMN21035428  
SAMN21035429  
SAMN21035430  
SAMN21035431  
SAMN21035432  
SAMN21035433  
SAMN21035434  
SAMN21035435  
SAMN21035436  
SAMN21035437  
SAMN21035438  
SAMN21035439  
SAMN21035440  
SAMN21035441  
SAMN21035442  
SAMN21035443  
SAMN21035444  
SAMN21035445  
SAMN21035446  
SAMN21035447  
SAMN21035448  
SAMN21035449  
SAMN21035450  
SAMN21035451  
SAMN21035452  
SAMN21035453  
SAMN21035454  
SAMN21035455  
SAMN21035456  
SAMN21035457  
SAMN21035458  
SAMN21035459  
SAMN21035460  
SAMN21035461  
SAMN21035462

SAMN21035463  
SAMN21035464  
SAMN21035465  
SAMN21035466  
SAMN21035467  
SAMN21035468  
SAMN21035469  
SAMN21035470  
SAMN21035471  
SAMN21035472  
SAMN21035473  
SAMN21035474  
SAMN21035475  
SAMN21035476  
SAMN21035477  
SAMN21035478  
SAMN21035479  
SAMN21035480  
SAMN21035481  
SAMN21035482  
SAMN21035483  
SAMN21035484  
SAMN21035485  
SAMN21035487  
SAMN21035488  
SAMN21035489  
SAMN21035490  
SAMN21035491  
SAMN21035492  
SAMN21035493  
SAMN21035494  
SAMN21035495  
SAMN21036177  
SAMN21036178  
SAMN21036179  
SAMN21036180  
SAMN21036181  
SAMN21036182  
SAMN21036183  
SAMN21036184  
SAMN21036185  
SAMN21036186  
SAMN21036187  
SAMN21036188

SAMN21036189  
SAMN21036190  
SAMN21036191  
SAMN21036192  
SAMN21036193  
SAMN21036194  
SAMN21036195  
SAMN21036196  
SAMN21036197  
SAMN21036198  
SAMN21036202  
SAMN21036206  
SAMN21036207  
SAMN21036208  
SAMN21036209  
SAMN21036210  
SAMN21036211  
SAMN21036213  
SAMN21036214  
SAMN21036215  
SAMN21036221  
SAMN21036222  
SAMN21036223  
SAMN21036224  
SAMN21036225  
SAMN21036226  
SAMN21036227  
SAMN21036228  
SAMN21036229  
SAMN21036232  
SAMN21036233  
SAMN21036234  
SAMN21036235  
SAMN21036236  
SAMN21036237  
SAMN21036238  
SAMN21036239  
SAMN21036241  
SAMN21036242  
SAMN21036248  
SAMN21036250  
SAMN21036251  
SAMN21036252  
SAMN21036253

SAMN21036254  
SAMN21036255  
SAMN21036256  
SAMN21036257  
SAMN21036258  
SAMN21036259  
SAMN21036260  
SAMN21036261  
SAMN21036262  
SAMN21036263  
SAMN21036264  
SAMN21036265  
SAMN21036266  
SAMN21036267  
SAMN21036268  
SAMN21036269  
SAMN21036270  
SAMN21036271  
SAMN21036272  
SAMN21036273  
SAMN21036274  
SAMN21036275  
SAMN21036281  
SAMN21036283  
SAMN21036284  
SAMN21036285  
SAMN21036286  
SAMN21036287  
SAMN21036288  
SAMN21036289  
SAMN21036290  
SAMN21036291  
SAMN21036292  
SAMN21036293  
SAMN21036294  
SAMN21036301  
SAMN21036302  
SAMN21036303  
SAMN21036304  
SAMN21036305  
SAMN21036306  
SAMN21036307  
SAMN21036308  
SAMN21036309

SAMN21036310  
SAMN21036311  
SAMN21036312  
SAMN21036319  
SAMN21036320  
SAMN21036321  
SAMN21036322  
SAMN21036325  
SAMN21036328  
SAMN21036332  
SAMN21036333  
SAMN21036334  
SAMN21036335  
SAMN21036336  
SAMN21036337  
SAMN21036338  
SAMN21036340  
SAMN21036344  
SAMN21036346  
SAMN21036348  
SAMN21036349  
SAMN21036350  
SAMN21036351  
SAMN21036352  
SAMN21036353  
SAMN21036354  
SAMN21036355  
SAMN21036362  
SAMN21036363  
SAMN21036364  
SAMN21036371  
SAMN21036372  
SAMN21036373  
SAMN21036374  
SAMN21036375  
SAMN21036376  
SAMN21036377  
SAMN21036378  
SAMN21036379  
SAMN21036380  
SAMN21036381  
SAMN21036382  
SAMN21036383  
SAMN21036384

SAMN21036385  
SAMN21036386  
SAMN21036387  
SAMN21036394  
SAMN21036395  
SAMN21036396  
SAMN21036397  
SAMN21036398  
SAMN21036399  
SAMN21036400  
SAMN21036401  
SAMN21036402  
SAMN21036403  
SAMN21036404  
SAMN21036405  
SAMN21036406  
SAMN21036407  
SAMN21036408  
SAMN21036409  
SAMN21036410  
SAMN21036411  
SAMN21036412  
SAMN21036413  
SAMN21036414  
SAMN21036415  
SAMN21036416  
SAMN21036417  
SAMN21036418  
SAMN21036419  
SAMN21036420  
SAMN21036421  
SAMN21036422  
SAMN21036423  
SAMN21036424  
SAMN21036425  
SAMN21036426  
SAMN21036427  
SAMN21036428  
SAMN21036429  
SAMN21036430  
SAMN21036431  
SAMN21036432  
SAMN21036433  
SAMN21036434



SAMN21036435  
SAMN21036436  
SAMN21036437  
SAMN21036438  
SAMN21036439  
SAMN21036440  
SAMN21036441  
SAMN21036442  
SAMN21036443  
SAMN21036444  
SAMN21036445  
SAMN21036446  
SAMN21036448  
SAMN21036454  
SAMN21036455  
SAMN21036456  
SAMN21036457  
SAMN21036458  
SAMN21036459  
SAMN21036460  
SAMN21036467  
SAMN21036468  
SAMN21036469  
SAMN21036470  
SAMN21036471  
SAMN21036472  
SAMN21036473  
SAMN21036474  
SAMN21036475  
SAMN21036482  
SAMN21036483  
SAMN21036484  
SAMN21036485  
SAMN21036486  
SAMN21036489  
SAMN21036492  
SAMN21036495  
SAMN21036496  
SAMN21036497  
SAMN21036498  
SAMN21036499  
SAMN21036500  
SAMN21036501  
SAMN21036502

SAMN21036503  
SAMN21036504  
SAMN21036505  
SAMN21036506  
SAMN21036507  
SAMN21036509  
SAMN21036510  
SAMN21036511  
SAMN21036512  
SAMN21036513  
SAMN21036514  
SAMN21036515  
SAMN21036516  
SAMN21036517  
SAMN21036519  
SAMN21036520  
SAMN21036526  
SAMN21036534  
SAMN21036535  
SAMN21036536  
SAMN21036199  
SAMN21036200  
SAMN21036201  
SAMN21036203  
SAMN21036204  
SAMN21036205  
SAMN21036212  
SAMN21036216  
SAMN21036217  
SAMN21036218  
SAMN21036219  
SAMN21036220  
SAMN21036243  
SAMN21036244  
SAMN21036245  
SAMN21036246  
SAMN21036247  
SAMN21036249  
SAMN21036276  
SAMN21036277  
SAMN21036278  
SAMN21036279  
SAMN21036280  
SAMN21036282

SAMN21036295  
SAMN21036296  
SAMN21036297  
SAMN21036298  
SAMN21036299  
SAMN21036300  
SAMN21036313  
SAMN21036314  
SAMN21036315  
SAMN21036316  
SAMN21036318  
SAMN21036323  
SAMN21036324  
SAMN21036326  
SAMN21036327  
SAMN21036329  
SAMN21036330  
SAMN21036339  
SAMN21036341  
SAMN21036342  
SAMN21036343  
SAMN21036345  
SAMN21036347  
SAMN21036356  
SAMN21036357  
SAMN21036358  
SAMN21036359  
SAMN21036360  
SAMN21036361  
SAMN21036365  
SAMN21036366  
SAMN21036367  
SAMN21036368  
SAMN21036369  
SAMN21036370  
SAMN21036388  
SAMN21036389  
SAMN21036390  
SAMN21036391  
SAMN21036392  
SAMN21036393  
SAMN21036447  
SAMN21036449  
SAMN21036450

SAMN21036451  
SAMN21036452  
SAMN21036453  
SAMN21036461  
SAMN21036462  
SAMN21036463  
SAMN21036464  
SAMN21036465  
SAMN21036466  
SAMN21036476  
SAMN21036477  
SAMN21036478  
SAMN21036479  
SAMN21036480  
SAMN21036481  
SAMN21036487  
SAMN21036488  
SAMN21036490  
SAMN21036491  
SAMN21036493  
SAMN21036494  
SAMN21036508  
SAMN21036518  
SAMN21036521  
SAMN21036522  
SAMN21036523  
SAMN21036524  
SAMN21036525  
SAMN21036528  
SAMN21036529  
SAMN21036530  
SAMN21036531  
SAMN21036532  
SAMN21036533  
SAMN39309472  
SAMN39309473  
SAMN39309474  
SAMN39309475  
SAMN39309476  
SAMN39309477  
SAMN39309478  
SAMN39309479  
SAMN39309480  
SAMN39309481

SAMN39309482  
SAMN39309483  
SAMN39309484  
SAMN39309485  
SAMN39309486  
SAMN39309487  
SAMN39309488  
SAMN39309489  
SAMN39309490  
SAMN39309491  
SAMN39309492  
SAMN39309493  
SAMN39309494  
SAMN39309495  
SAMN39309496  
SAMN39309497  
SAMN39309498

ding order with rpoband CNP Weimaraner highlighted at the top.
